# Supplementary material for: Brief communication: Plasma cortisol concentration is affected by lactation, but not intra-nasal oxytocin treatment, in beef cows
Source: PLoS One. 2021 Jul 30;16(7):e0249323. doi: 10.1371/journal.pone.0249323 (PMC8323922; doi:10.1371/journal.pone.0249323)
Supplement: S1 Dataset — (XLSX) [file pone.0249323.s001.xlsx]

## Sheet: Cortisol
Sample ID	Animal ID	Intranasal Trt (S, saline; OXT, oxytocin)	Lactation status (NL, non-lactating; L, lactating)	Day	AM or PM	Time	Cortisol, ng/mL
1	8719	S	NL	1	AM	0	23.525
2	8719	S	NL	1	AM	30	29.605
3	8719	S	NL	1	AM	45	28.4625
4	8719	S	NL	1	AM	60	27.5675
5	8719	S	NL	1	AM	62	16.89
6	8719	S	NL	1	AM	64	25.355
7	8719	S	NL	1	AM	66	27.085
8	8719	S	NL	1	AM	68	26.4625
9	8719	S	NL	1	AM	70	22.8575
10	8719	S	NL	1	AM	80	24.665
11	8719	S	NL	1	AM	90	31.825
12	8719	S	NL	1	AM	100	31.11
13	8719	S	NL	1	AM	110	14.3125
14	8719	S	NL	1	AM	120	13.2475
16	8719	S	NL	1	AM	140	18.93
20	8719	S	NL	1	AM	180	25.6675
21	516	S	L	1	AM	0	6.23
22	516	S	L	1	AM	30	22.12
23	516	S	L	1	AM	45	13.4925
24	516	S	L	1	AM	60	25.405
25	516	S	L	1	AM	62	24.86
26	516	S	L	1	AM	64	22.7575
27	516	S	L	1	AM	66	30.015
28	516	S	L	1	AM	68	25.9725
29	516	S	L	1	AM	70	37.8025
30	516	S	L	1	AM	80	19.365
31	516	S	L	1	AM	90	6.595
32	516	S	L	1	AM	100	3.49625
33	516	S	L	1	AM	110	7.435
34	516	S	L	1	AM	120	5.3575
36	516	S	L	1	AM	140	5.5865
40	516	S	L	1	AM	180	6.12
41	545	OXT	NL	1	AM	0	11.7125
42	545	OXT	NL	1	AM	30	10.3175
43	545	OXT	NL	1	AM	45	13.0475
44	545	OXT	NL	1	AM	60	13.1025
45	545	OXT	NL	1	AM	62	12.145
46	545	OXT	NL	1	AM	64	9.3
47	545	OXT	NL	1	AM	66	8.8525
48	545	OXT	NL	1	AM	68	12.4325
49	545	OXT	NL	1	AM	70	10.6675
50	545	OXT	NL	1	AM	80	9.3675
51	545	OXT	NL	1	AM	90	9.06
52	545	OXT	NL	1	AM	100	9.4375
53	545	OXT	NL	1	AM	110	9.185
54	545	OXT	NL	1	AM	120	12.9612
56	545	OXT	NL	1	AM	140	14.245
60	545	OXT	NL	1	AM	180	13.975
61	561	OXT	L	1	AM	0	2.97225
62	561	OXT	L	1	AM	30	3.59725
63	561	OXT	L	1	AM	45	5.2
64	561	OXT	L	1	AM	60	3.09612
65	561	OXT	L	1	AM	62	2.5225
66	561	OXT	L	1	AM	64	5.4705
67	561	OXT	L	1	AM	66	9.935
68	561	OXT	L	1	AM	68	8.3175
69	561	OXT	L	1	AM	70	12.0625
70	561	OXT	L	1	AM	80	5.40025
71	561	OXT	L	1	AM	90	4.181
72	561	OXT	L	1	AM	100	4.9885
73	561	OXT	L	1	AM	110	2.80175
74	561	OXT	L	1	AM	120	1.20875
76	561	OXT	L	1	AM	140	21.8425
80	561	OXT	L	1	AM	180	21.07
81	590	S	NL	1	PM	0	6.77
82	590	S	NL	1	PM	30	14.295
83	590	S	NL	1	PM	45	18.2625
84	590	S	NL	1	PM	60	12.9875
85	590	S	NL	1	PM	62	11.165
86	590	S	NL	1	PM	64	17.7375
87	590	S	NL	1	PM	66	11.9075
88	590	S	NL	1	PM	68	12.885
89	590	S	NL	1	PM	70	11.555
90	590	S	NL	1	PM	80	25.6925
91	590	S	NL	1	PM	90	12.3475
92	590	S	NL	1	PM	100	14.67
93	590	S	NL	1	PM	110	11.55
94	590	S	NL	1	PM	120	14.5125
96	590	S	NL	1	PM	140	23.05
100	590	S	NL	1	PM	180	32.49
101	2921	S	L	1	PM	0	1.435
102	2921	S	L	1	PM	30	0.892
103	2921	S	L	1	PM	45	4.8945
104	2921	S	L	1	PM	60	6.0775
105	2921	S	L	1	PM	62	2.41375
106	2921	S	L	1	PM	64	7.2975
107	2921	S	L	1	PM	66	10.845
108	2921	S	L	1	PM	68	9.7675
109	2921	S	L	1	PM	70	10.1875
110	2921	S	L	1	PM	80	12.655
111	2921	S	L	1	PM	90	2.77725
112	2921	S	L	1	PM	100	3.71325
113	2921	S	L	1	PM	110	1.93775
114	2921	S	L	1	PM	120	1.2135
116	2921	S	L	1	PM	140	6.06
120	2921	S	L	1	PM	180	10.2275
121	904	OXT	NL	1	PM	0	48.455
122	904	OXT	NL	1	PM	30	61.425
123	904	OXT	NL	1	PM	45	59.525
124	904	OXT	NL	1	PM	60	54.525
125	904	OXT	NL	1	PM	62	57.975
126	904	OXT	NL	1	PM	64	39.9125
127	904	OXT	NL	1	PM	66	33.27
128	904	OXT	NL	1	PM	68	55.675
129	904	OXT	NL	1	PM	70	44.3775
130	904	OXT	NL	1	PM	80	54.75
131	904	OXT	NL	1	PM	90	53.1775
132	904	OXT	NL	1	PM	100	49.2175
133	904	OXT	NL	1	PM	110	54.825
134	904	OXT	NL	1	PM	120	60.15
136	904	OXT	NL	1	PM	140	52.115
140	904	OXT	NL	1	PM	180	65.125
141	858	OXT	L	1	PM	0	5.27925
142	858	OXT	L	1	PM	30	3.95975
143	858	OXT	L	1	PM	45	4.125
144	858	OXT	L	1	PM	60	2.18025
145	858	OXT	L	1	PM	62	7.6775
146	858	OXT	L	1	PM	64	20.8425
147	858	OXT	L	1	PM	66	13.695
148	858	OXT	L	1	PM	68	15.1575
149	858	OXT	L	1	PM	70	11.035
150	858	OXT	L	1	PM	80	12.44
151	858	OXT	L	1	PM	90	7.2275
152	858	OXT	L	1	PM	100	7.0725
153	858	OXT	L	1	PM	110	1.8415
154	858	OXT	L	1	PM	120	2.2485
156	858	OXT	L	1	PM	140	4.44
160	858	OXT	L	1	PM	180	6.465
161	4348	OXT	NL	2	AM	0	11.3425
162	4348	OXT	NL	2	AM	30	24.0775
163	4348	OXT	NL	2	AM	45	10.12
164	4348	OXT	NL	2	AM	60	18.385
165	4348	OXT	NL	2	AM	62	17.405
166	4348	OXT	NL	2	AM	64	26.8075
167	4348	OXT	NL	2	AM	66	29.875
168	4348	OXT	NL	2	AM	68	21.195
169	4348	OXT	NL	2	AM	70	18.825
170	4348	OXT	NL	2	AM	80	23.4925
171	4348	OXT	NL	2	AM	90	23.6025
172	4348	OXT	NL	2	AM	100	33.5125
173	4348	OXT	NL	2	AM	110	21.46
174	4348	OXT	NL	2	AM	120	15.675
176	4348	OXT	NL	2	AM	140	21.065
180	4348	OXT	NL	2	AM	180	18.5175
181	971	S	L	2	AM	0	33.855
182	971	S	L	2	AM	30	15.0125
183	971	S	L	2	AM	45	1.8555
184	971	S	L	2	AM	60	17.18
185	971	S	L	2	AM	62	14.7475
186	971	S	L	2	AM	64	20.815
187	971	S	L	2	AM	66	11.55
188	971	S	L	2	AM	68	21.7675
189	971	S	L	2	AM	70	6.535
190	971	S	L	2	AM	80	21.3325
191	971	S	L	2	AM	90	6.3125
192	971	S	L	2	AM	100	28.1525
193	971	S	L	2	AM	110	17.6425
194	971	S	L	2	AM	120	22.535
196	971	S	L	2	AM	140	37.2475
200	971	S	L	2	AM	180	38.115
201	852	OXT	L	2	AM	0	4.929
202	852	OXT	L	2	AM	30	6.3425
203	852	OXT	L	2	AM	45	0.93275
204	852	OXT	L	2	AM	60	3.5225
205	852	OXT	L	2	AM	62	3.89325
206	852	OXT	L	2	AM	64	0.3324
207	852	OXT	L	2	AM	66	8.5925
208	852	OXT	L	2	AM	68	10.3325
209	852	OXT	L	2	AM	70	20.655
210	852	OXT	L	2	AM	80	14.9875
211	852	OXT	L	2	AM	90	8.2775
212	852	OXT	L	2	AM	100	5.54675
213	852	OXT	L	2	AM	110	0.81525
214	852	OXT	L	2	AM	120	0.873
216	852	OXT	L	2	AM	140	1.62375
220	852	OXT	L	2	AM	180	1.7625
221	968	S	L	2	AM	0	27.345
222	968	S	L	2	AM	30	5.4975
223	968	S	L	2	AM	45	1.04075
224	968	S	L	2	AM	60	7.7475
225	968	S	L	2	AM	62	6.6275
226	968	S	L	2	AM	64	2.0025
227	968	S	L	2	AM	66	25.885
228	968	S	L	2	AM	68	16.955
229	968	S	L	2	AM	70	7.1125
230	968	S	L	2	AM	80	12.3775
231	968	S	L	2	AM	90	3.8155
232	968	S	L	2	AM	100	4.719
233	968	S	L	2	AM	110	5.9475
234	968	S	L	2	AM	120	3.54975
236	968	S	L	2	AM	140	3.506
240	968	S	L	2	AM	180	10.8175
241	1026	S	NL	2	PM	0	8.3925
242	1026	S	NL	2	PM	30	17.54
243	1026	S	NL	2	PM	45	14.2625
244	1026	S	NL	2	PM	60	20.81
245	1026	S	NL	2	PM	62	13.4175
246	1026	S	NL	2	PM	64	26.725
247	1026	S	NL	2	PM	66	.
248	1026	S	NL	2	PM	68	24.775
249	1026	S	NL	2	PM	70	23.1
250	1026	S	NL	2	PM	80	22.0025
251	1026	S	NL	2	PM	90	33.6375
252	1026	S	NL	2	PM	100	48.245
253	1026	S	NL	2	PM	110	26.7475
254	1026	S	NL	2	PM	120	40.85
256	1026	S	NL	2	PM	140	39.3175
260	1026	S	NL	2	PM	180	45.625
261	798	OXT	NL	2	PM	0	26.665
262	798	OXT	NL	2	PM	30	24.815
263	798	OXT	NL	2	PM	45	24.7175
264	798	OXT	NL	2	PM	60	19.7925
265	798	OXT	NL	2	PM	62	7.1675
266	798	OXT	NL	2	PM	64	24.505
267	798	OXT	NL	2	PM	66	17.465
268	798	OXT	NL	2	PM	68	3.27775
269	798	OXT	NL	2	PM	70	3.63575
270	798	OXT	NL	2	PM	80	8.3425
271	798	OXT	NL	2	PM	90	21.4475
272	798	OXT	NL	2	PM	100	21.475
273	798	OXT	NL	2	PM	110	41.745
274	798	OXT	NL	2	PM	120	16.26
276	798	OXT	NL	2	PM	140	17.7025
280	798	OXT	NL	2	PM	180	31.2475
301	995	S	L	2	PM	0	4.2305
302	995	S	L	2	PM	30	3.78975
303	995	S	L	2	PM	45	6.2625
304	995	S	L	2	PM	60	19.0425
305	995	S	L	2	PM	62	21.5925
306	995	S	L	2	PM	64	19.84
307	995	S	L	2	PM	66	26.8275
308	995	S	L	2	PM	68	26.755
309	995	S	L	2	PM	70	22.2775
310	995	S	L	2	PM	80	17.4075
311	995	S	L	2	PM	90	9.145
312	995	S	L	2	PM	100	5.6225
313	995	S	L	2	PM	110	4.36425
314	995	S	L	2	PM	120	2.6895
316	995	S	L	2	PM	140	1.94
320	995	S	L	2	PM	180	8.2875
321	840	S	L	3	AM	0	5.8625
322	840	S	L	3	AM	30	1.368
323	840	S	L	3	AM	45	3.528
324	840	S	L	3	AM	60	2.51575
325	840	S	L	3	AM	62	1.23075
326	840	S	L	3	AM	64	1.2135
327	840	S	L	3	AM	66	2.32125
328	840	S	L	3	AM	68	9.2925
329	840	S	L	3	AM	70	4.6785
330	840	S	L	3	AM	80	5.08275
331	840	S	L	3	AM	90	4.74125
332	840	S	L	3	AM	100	2.43925
333	840	S	L	3	AM	110	1.63225
334	840	S	L	3	AM	120	1.57375
336	840	S	L	3	AM	140	1.72175
340	840	S	L	3	AM	180	5.06675
361	833	S	NL	3	AM	0	3.37475
362	833	S	NL	3	AM	30	18.2075
363	833	S	NL	3	AM	45	13.72
364	833	S	NL	3	AM	60	38.565
365	833	S	NL	3	AM	62	26.9975
366	833	S	NL	3	AM	64	24.265
367	833	S	NL	3	AM	66	28.905
368	833	S	NL	3	AM	68	28.7925
369	833	S	NL	3	AM	70	36.7
370	833	S	NL	3	AM	80	36.6025
371	833	S	NL	3	AM	90	37.585
372	833	S	NL	3	AM	100	26.6
373	833	S	NL	3	AM	110	37.03
374	833	S	NL	3	AM	120	40.3225
376	833	S	NL	3	AM	140	40.6925
380	833	S	NL	3	AM	180	23.1225
381	835	OXT	NL	3	AM	0	41.32
382	835	OXT	NL	3	AM	30	44.885
383	835	OXT	NL	3	AM	45	55.525
384	835	OXT	NL	3	AM	60	41.615
385	835	OXT	NL	3	AM	62	28.885
386	835	OXT	NL	3	AM	64	36.255
387	835	OXT	NL	3	AM	66	5.2815
388	835	OXT	NL	3	AM	68	5.3675
389	835	OXT	NL	3	AM	70	8.435
390	835	OXT	NL	3	AM	80	28.8625
391	835	OXT	NL	3	AM	90	29.0975
392	835	OXT	NL	3	AM	100	4.764
393	835	OXT	NL	3	AM	110	12.3725
394	835	OXT	NL	3	AM	120	17.975
396	835	OXT	NL	3	AM	140	23.8225
400	835	OXT	NL	3	AM	180	24.975

## Sheet: Oxytocin
Sample ID	Animal ID	Intranasal Trt (S, saline; OXT, oxytocin)	Lactation status (NL, non-lactating; L, lactating)	Day	AM or PM	Time	Oxytocin, pg/mL
1	8719	NL	S	1	AM	0	4.09417
2	8719	NL	S	1	AM	30	3.01459
3	8719	NL	S	1	AM	45	3.42705
4	8719	NL	S	1	AM	60	7.13924
5	8719	NL	S	1	AM	62	4.32058
6	8719	NL	S	1	AM	64	3.07173
7	8719	NL	S	1	AM	66	3.31938
8	8719	NL	S	1	AM	68	3.05753
9	8719	NL	S	1	AM	70	4.36702
10	8719	NL	S	1	AM	80	4.66711
11	8719	NL	S	1	AM	90	5.2437
12	8719	NL	S	1	AM	100	6.62481
13	8719	NL	S	1	AM	110	4.9534
14	8719	NL	S	1	AM	120	4.96934
15	8719	NL	S	1	AM	130	5.34043
16	8719	NL	S	1	AM	140	3.94391
17	8719	NL	S	1	AM	150	4.44885
18	8719	NL	S	1	AM	160	5.31136
19	8719	NL	S	1	AM	170	6.11255
20	8719	NL	S	1	AM	180	5.27279
21	516	L	S	1	AM	0	2.5
22	516	L	S	1	AM	30	2.5
23	516	L	S	1	AM	45	2.5
24	516	L	S	1	AM	60	2.5
25	516	L	S	1	AM	62	2.5
26	516	L	S	1	AM	64	2.5
27	516	L	S	1	AM	66	2.5
28	516	L	S	1	AM	68	2.5
29	516	L	S	1	AM	70	2.5
30	516	L	S	1	AM	80	2.5
31	516	L	S	1	AM	90	2.5
32	516	L	S	1	AM	100	2.5
33	516	L	S	1	AM	110	2.5
34	516	L	S	1	AM	120	2.5
35	516	L	S	1	AM	130	2.5
36	516	L	S	1	AM	140	2.5
37	516	L	S	1	AM	150	2.5
38	516	L	S	1	AM	160	2.5
39	516	L	S	1	AM	170	2.5
40	516	L	S	1	AM	180	2.5
41	545	NL	OXT	1	AM	0	4.5321
42	545	NL	OXT	1	AM	30	3.90255
43	545	NL	OXT	1	AM	45	3.82557
44	545	NL	OXT	1	AM	60	4.38534
45	545	NL	OXT	1	AM	62	11.0535
46	545	NL	OXT	1	AM	64	52.5105
47	545	NL	OXT	1	AM	66	74.0343
48	545	NL	OXT	1	AM	68	82.2951
49	545	NL	OXT	1	AM	70	86.0168
50	545	NL	OXT	1	AM	80	75.8693
51	545	NL	OXT	1	AM	90	36.5792
52	545	NL	OXT	1	AM	100	13.5887
53	545	NL	OXT	1	AM	110	9.52208
54	545	NL	OXT	1	AM	120	5.18032
55	545	NL	OXT	1	AM	130	5.96427
56	545	NL	OXT	1	AM	140	5.15855
57	545	NL	OXT	1	AM	150	4.56673
58	545	NL	OXT	1	AM	160	4.41874
59	545	NL	OXT	1	AM	170	4.4923
60	545	NL	OXT	1	AM	180	4.32737
61	561	L	OXT	1	AM	0	3.46483
62	561	L	OXT	1	AM	30	3.21445
63	561	L	OXT	1	AM	45	4.02949
64	561	L	OXT	1	AM	60	3.1756
65	561	L	OXT	1	AM	62	89.5722
66	561	L	OXT	1	AM	64	87.7162
67	561	L	OXT	1	AM	66	79.5192
68	561	L	OXT	1	AM	68	66.3865
69	561	L	OXT	1	AM	70	75.9109
70	561	L	OXT	1	AM	80	36.0853
71	561	L	OXT	1	AM	90	33.4702
72	561	L	OXT	1	AM	100	19.9494
73	561	L	OXT	1	AM	110	12.5076
74	561	L	OXT	1	AM	120	7.97847
75	561	L	OXT	1	AM	130	6.33359
76	561	L	OXT	1	AM	140	8.03053
77	561	L	OXT	1	AM	150	5.60383
78	561	L	OXT	1	AM	160	4.25832
79	561	L	OXT	1	AM	170	4.07945
80	561	L	OXT	1	AM	180	4.7228
81	590	NL	S	1	PM	0	3.57491
82	590	NL	S	1	PM	30	3.32232
83	590	NL	S	1	PM	45	3.34017
84	590	NL	S	1	PM	60	3.51699
85	590	NL	S	1	PM	62	3.82714
86	590	NL	S	1	PM	64	3.64871
87	590	NL	S	1	PM	66	2.99598
88	590	NL	S	1	PM	68	2.54825
89	590	NL	S	1	PM	70	3.27648
90	590	NL	S	1	PM	80	3.13929
91	590	NL	S	1	PM	90	3.87943
92	590	NL	S	1	PM	100	3.64766
93	590	NL	S	1	PM	110	6.3102
94	590	NL	S	1	PM	120	5.05421
95	590	NL	S	1	PM	130	3.47352
96	590	NL	S	1	PM	140	3.67577
97	590	NL	S	1	PM	150	3.18908
98	590	NL	S	1	PM	160	3.62085
99	590	NL	S	1	PM	170	6.47272
100	590	NL	S	1	PM	180	4.06226
101	2921	L	S	1	PM	0	3.9794
102	2921	L	S	1	PM	30	3.43586
103	2921	L	S	1	PM	45	3.20825
104	2921	L	S	1	PM	60	2.84309
105	2921	L	S	1	PM	62	3.11218
106	2921	L	S	1	PM	64	3.11497
107	2921	L	S	1	PM	66	4.19805
108	2921	L	S	1	PM	68	4.1158
109	2921	L	S	1	PM	70	3.25731
110	2921	L	S	1	PM	80	3.35736
111	2921	L	S	1	PM	90	3.20366
112	2921	L	S	1	PM	100	3.04331
113	2921	L	S	1	PM	110	3.16793
114	2921	L	S	1	PM	120	2.98183
115	2921	L	S	1	PM	130	3.606
116	2921	L	S	1	PM	140	3.73989
117	2921	L	S	1	PM	150	3.95725
118	2921	L	S	1	PM	160	3.04005
119	2921	L	S	1	PM	170	2.96774
120	2921	L	S	1	PM	180	3.29113
121	904	NL	OXT	1	PM	0	7.42251
122	904	NL	OXT	1	PM	30	5.46393
123	904	NL	OXT	1	PM	45	6.05132
124	904	NL	OXT	1	PM	60	6.1359
125	904	NL	OXT	1	PM	62	111.43
126	904	NL	OXT	1	PM	64	93.8257
127	904	NL	OXT	1	PM	66	81.7698
130	904	NL	OXT	1	PM	80	68.9037
131	904	NL	OXT	1	PM	90	41.129
132	904	NL	OXT	1	PM	100	22.3065
133	904	NL	OXT	1	PM	110	18.0949
134	904	NL	OXT	1	PM	120	11.2838
135	904	NL	OXT	1	PM	130	6.06635
136	904	NL	OXT	1	PM	140	6.39863
137	904	NL	OXT	1	PM	150	6.56786
138	904	NL	OXT	1	PM	160	12.8271
139	904	NL	OXT	1	PM	170	5.79801
140	904	NL	OXT	1	PM	180	16.8459
141	858	L	OXT	1	PM	0	2.95789
142	858	L	OXT	1	PM	30	2.88024
143	858	L	OXT	1	PM	45	2.5
144	858	L	OXT	1	PM	60	12.501
145	858	L	OXT	1	PM	62	68.3812
146	858	L	OXT	1	PM	64	31.9403
147	858	L	OXT	1	PM	66	18.0251
148	858	L	OXT	1	PM	68	79.0775
150	858	L	OXT	1	PM	80	4.55452
151	858	L	OXT	1	PM	90	4.55452
152	858	L	OXT	1	PM	100	5.35909
153	858	L	OXT	1	PM	110	4.33001
154	858	L	OXT	1	PM	120	3.44293
155	858	L	OXT	1	PM	130	3.40051
156	858	L	OXT	1	PM	140	3.96391
157	858	L	OXT	1	PM	150	4.76044
158	858	L	OXT	1	PM	160	4.10853
159	858	L	OXT	1	PM	170	3.53663
160	858	L	OXT	1	PM	180	3.13366
161	4348	NL	OXT	2	AM	0	9.75055
162	4348	NL	OXT	2	AM	30	7.60715
163	4348	NL	OXT	2	AM	45	7.09746
164	4348	NL	OXT	2	AM	60	8.26266
165	4348	NL	OXT	2	AM	62	82.6219
166	4348	NL	OXT	2	AM	64	14.2392
167	4348	NL	OXT	2	AM	66	13.0329
168	4348	NL	OXT	2	AM	68	9.43069
169	4348	NL	OXT	2	AM	70	9.79219
170	4348	NL	OXT	2	AM	80	8.08847
171	4348	NL	OXT	2	AM	90	76.7918
172	4348	NL	OXT	2	AM	100	65.4298
173	4348	NL	OXT	2	AM	110	60.0337
174	4348	NL	OXT	2	AM	120	44.4782
175	4348	NL	OXT	2	AM	130	56.7652
176	4348	NL	OXT	2	AM	140	2.5
177	4348	NL	OXT	2	AM	150	2.5
178	4348	NL	OXT	2	AM	160	2.5
179	4348	NL	OXT	2	AM	170	2.5
180	4348	NL	OXT	2	AM	180	2.5
181	971	L	S	2	AM	0	2.5
182	971	L	S	2	AM	30	2.5
183	971	L	S	2	AM	45	2.5
184	971	L	S	2	AM	60	2.5
185	971	L	S	2	AM	62	2.5
186	971	L	S	2	AM	64	2.5
187	971	L	S	2	AM	66	2.5
188	971	L	S	2	AM	68	2.5
189	971	L	S	2	AM	70	2.5
190	971	L	S	2	AM	80	2.5
191	971	L	S	2	AM	90	2.5
192	971	L	S	2	AM	100	2.68467
193	971	L	S	2	AM	110	2.5
194	971	L	S	2	AM	120	2.5
195	971	L	S	2	AM	130	2.5
196	971	L	S	2	AM	140	2.5
197	971	L	S	2	AM	150	2.5
198	971	L	S	2	AM	160	2.5
199	971	L	S	2	AM	170	2.5
200	971	L	S	2	AM	180	2.5
201	852	L	OXT	2	AM	0	2.5
202	852	L	OXT	2	AM	30	2.5
203	852	L	OXT	2	AM	45	2.5
204	852	L	OXT	2	AM	60	2.5
205	852	L	OXT	2	AM	62	2.5
206	852	L	OXT	2	AM	64	2.5
207	852	L	OXT	2	AM	66	2.5
208	852	L	OXT	2	AM	68	23.5433
209	852	L	OXT	2	AM	70	2.5
210	852	L	OXT	2	AM	80	2.5
211	852	L	OXT	2	AM	90	2.5
212	852	L	OXT	2	AM	100	2.5
213	852	L	OXT	2	AM	110	2.5
214	852	L	OXT	2	AM	120	2.5
215	852	L	OXT	2	AM	130	2.5
216	852	L	OXT	2	AM	140	2.5
217	852	L	OXT	2	AM	150	2.5
218	852	L	OXT	2	AM	160	2.5
219	852	L	OXT	2	AM	170	2.5
220	852	L	OXT	2	AM	180	2.5
221	968	L	S	2	AM	0	2.5
222	968	L	S	2	AM	30	2.5
223	968	L	S	2	AM	45	2.5
224	968	L	S	2	AM	60	2.5
225	968	L	S	2	AM	62	2.5
226	968	L	S	2	AM	64	2.5
227	968	L	S	2	AM	66	2.5
228	968	L	S	2	AM	68	2.5
229	968	L	S	2	AM	70	2.5
230	968	L	S	2	AM	80	2.5
231	968	L	S	2	AM	90	2.5
232	968	L	S	2	AM	100	2.5
233	968	L	S	2	AM	110	2.5
234	968	L	S	2	AM	120	2.5
235	968	L	S	2	AM	130	2.5
236	968	L	S	2	AM	140	2.5
237	968	L	S	2	AM	150	2.5
238	968	L	S	2	AM	160	2.5
239	968	L	S	2	AM	170	2.5
240	968	L	S	2	AM	180	2.5
241	1026	NL	S	2	PM	0	2.5
242	1026	NL	S	2	PM	30	2.5
243	1026	NL	S	2	PM	45	2.5
244	1026	NL	S	2	PM	60	2.5
245	1026	NL	S	2	PM	62	2.5
246	1026	NL	S	2	PM	64	2.5
248	1026	NL	S	2	PM	68	2.5
249	1026	NL	S	2	PM	70	2.5
250	1026	NL	S	2	PM	80	2.5
251	1026	NL	S	2	PM	90	2.5
252	1026	NL	S	2	PM	100	2.96519
253	1026	NL	S	2	PM	110	2.5
254	1026	NL	S	2	PM	120	2.5
255	1026	NL	S	2	PM	130	2.5
256	1026	NL	S	2	PM	140	2.5
257	1026	NL	S	2	PM	150	2.5
258	1026	NL	S	2	PM	160	2.5
259	1026	NL	S	2	PM	170	2.5
260	1026	NL	S	2	PM	180	2.5
261	798	NL	OXT	2	PM	0	2.5
262	798	NL	OXT	2	PM	30	2.5
263	798	NL	OXT	2	PM	45	2.5
264	798	NL	OXT	2	PM	60	2.5
265	798	NL	OXT	2	PM	62	2.5
266	798	NL	OXT	2	PM	64	37.6372
267	798	NL	OXT	2	PM	66	61.2584
268	798	NL	OXT	2	PM	68	43.8723
269	798	NL	OXT	2	PM	70	35.263
270	798	NL	OXT	2	PM	80	2.5
271	798	NL	OXT	2	PM	90	2.5
272	798	NL	OXT	2	PM	100	2.5
273	798	NL	OXT	2	PM	110	2.5
274	798	NL	OXT	2	PM	120	2.5
275	798	NL	OXT	2	PM	130	2.5
276	798	NL	OXT	2	PM	140	2.5
277	798	NL	OXT	2	PM	150	2.5
278	798	NL	OXT	2	PM	160	2.5
279	798	NL	OXT	2	PM	170	2.5
280	798	NL	OXT	2	PM	180	2.5
301	995	L	S	2	PM	0	2.5
302	995	L	S	2	PM	30	2.5
303	995	L	S	2	PM	45	2.5
304	995	L	S	2	PM	60	2.5
305	995	L	S	2	PM	62	2.5
306	995	L	S	2	PM	64	2.5
307	995	L	S	2	PM	66	2.5
308	995	L	S	2	PM	68	2.5
309	995	L	S	2	PM	70	2.5
310	995	L	S	2	PM	80	2.5
311	995	L	S	2	PM	90	2.5
312	995	L	S	2	PM	100	2.5
313	995	L	S	2	PM	110	2.5
314	995	L	S	2	PM	120	2.5
315	995	L	S	2	PM	130	2.5
316	995	L	S	2	PM	140	2.5
317	995	L	S	2	PM	150	2.5
318	995	L	S	2	PM	160	2.5
319	995	L	S	2	PM	170	2.5
320	995	L	S	2	PM	180	2.5
321	840	L	S	3	AM	0	2.5
322	840	L	S	3	AM	30	2.5
323	840	L	S	3	AM	45	2.5
324	840	L	S	3	AM	60	2.5
325	840	L	S	3	AM	62	2.5
326	840	L	S	3	AM	64	2.5
327	840	L	S	3	AM	66	2.5
328	840	L	S	3	AM	68	2.5
329	840	L	S	3	AM	70	2.5
330	840	L	S	3	AM	80	2.5
331	840	L	S	3	AM	90	2.5
332	840	L	S	3	AM	100	2.5
333	840	L	S	3	AM	110	2.5
334	840	L	S	3	AM	120	2.5
335	840	L	S	3	AM	130	2.5
336	840	L	S	3	AM	140	2.5
337	840	L	S	3	AM	150	2.5
338	840	L	S	3	AM	160	2.5
339	840	L	S	3	AM	170	2.5
340	840	L	S	3	AM	180	2.5
361	833	NL	S	3	AM	0	2.5
362	833	NL	S	3	AM	30	2.5
363	833	NL	S	3	AM	45	2.5
364	833	NL	S	3	AM	60	2.5
365	833	NL	S	3	AM	62	2.5
366	833	NL	S	3	AM	64	2.5
367	833	NL	S	3	AM	66	2.5
368	833	NL	S	3	AM	68	2.5
369	833	NL	S	3	AM	70	2.5
370	833	NL	S	3	AM	80	2.5
371	833	NL	S	3	AM	90	2.5
372	833	NL	S	3	AM	100	4.4002
373	833	NL	S	3	AM	110	2.5
374	833	NL	S	3	AM	120	2.5
375	833	NL	S	3	AM	130	2.5
376	833	NL	S	3	AM	140	2.5
377	833	NL	S	3	AM	150	2.5
378	833	NL	S	3	AM	160	2.5
379	833	NL	S	3	AM	170	2.5
380	833	NL	S	3	AM	180	2.5
381	835	NL	OXT	3	AM	0	2.5
382	835	NL	OXT	3	AM	30	2.5
383	835	NL	OXT	3	AM	45	.
384	835	NL	OXT	3	AM	60	2.5
385	835	NL	OXT	3	AM	62	50.844
386	835	NL	OXT	3	AM	64	26.6087
387	835	NL	OXT	3	AM	66	2.89717
388	835	NL	OXT	3	AM	68	2.5
389	835	NL	OXT	3	AM	70	4.77707
390	835	NL	OXT	3	AM	80	2.5
391	835	NL	OXT	3	AM	90	2.5
392	835	NL	OXT	3	AM	100	2.5
393	835	NL	OXT	3	AM	110	2.5
394	835	NL	OXT	3	AM	120	2.5
395	835	NL	OXT	3	AM	130	2.5
396	835	NL	OXT	3	AM	140	2.5
397	835	NL	OXT	3	AM	150	2.5
398	835	NL	OXT	3	AM	160	.
399	835	NL	OXT	3	AM	170	.
400	835	NL	OXT	3	AM	180	.
